# Supplementary material for: Programmable somatosensory soft robots
Source: Research Square preprint supplement (doi:10.21203/rs.3.rs-7149271/v1), 2025-08-25
Supplement: Supplementary file 1 [file 9cb45b3e758a684bc2002c79.docx]

**Supplementary Information**

**Programmable and somatosensory thermoresponsive soft robots**

*Antonia Georgopoulou1,2,* *Malena Aguiriano Calvo1,3, Lorenzo Lucherini1, Sudong Lee3, Josie Hughes3, Esther Amstad1,2*

1) Soft Materials Laboratory, Institute of Materials (SMaL), École Polytechnique Fédérale de Lausanne, 1015 Lausanne, Switzerland.

2) Swiss National Center for Competence in Research (NCCR) Bio-inspired Materials, University of Fribourg, Chemin des Verdiers 4, 1700 Fribourg, Switzerland.

3) CREATE Lab, Institute of Mechanical Engineering, École Polytechnique Fédérale de Lausanne, 1015 Lausanne, Switzerland.

E-mail: [esther.amstad@epfl.ch](mailto:esther.amstad@epfl.ch)


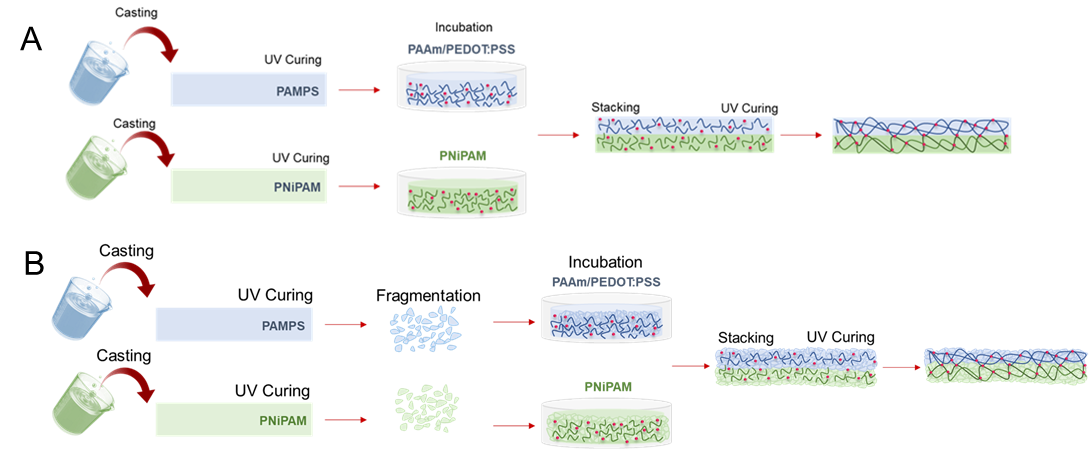


**Fig. S1.** Schematic illustration of the preparation of the actuators based on **A.** double network bulk and **B**. DNGH hydrogels.


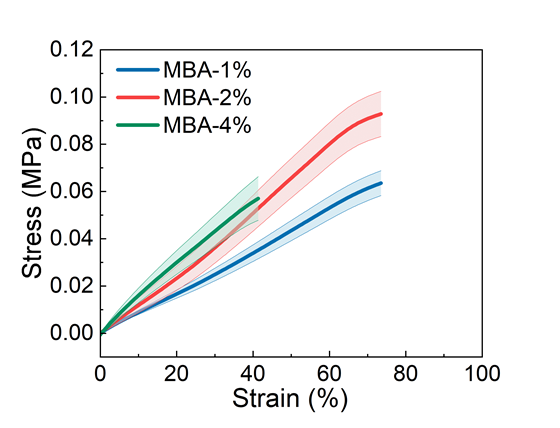


**Fig. S2.** Stress-strain curves of the DNGH-A composed of PNIPAM fragments containing 1 wt% (blue), 2 wt% (red) and 4 wt% (green) MBA crosslinker.


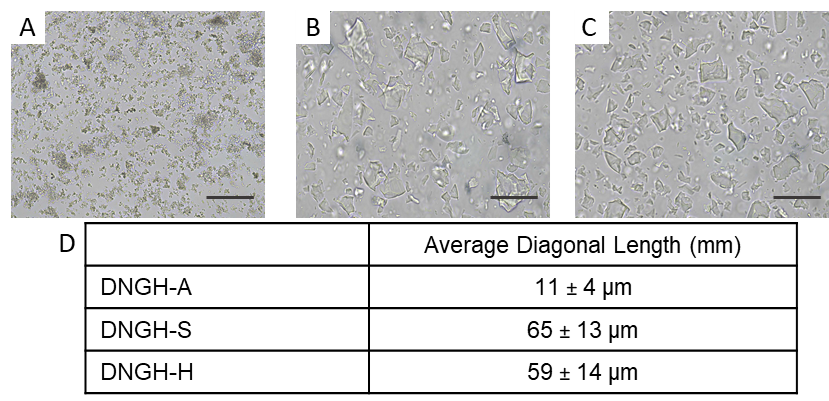


**Fig. S3**. Optical micrographs of **A**. PNIPAM microgels incubated in a NIPAM containing aqueous solution **B**. PAMPS microgels incubated in a AAm/PEDOT:PSS containing aqueous solution
C. PAMPS microgels incubated in an aqueous solution containing AAm, PEDOT:PSS and ZnCl2 (Scale bars 100 µm). **D**. The average diagonal length derived from A,B,C.


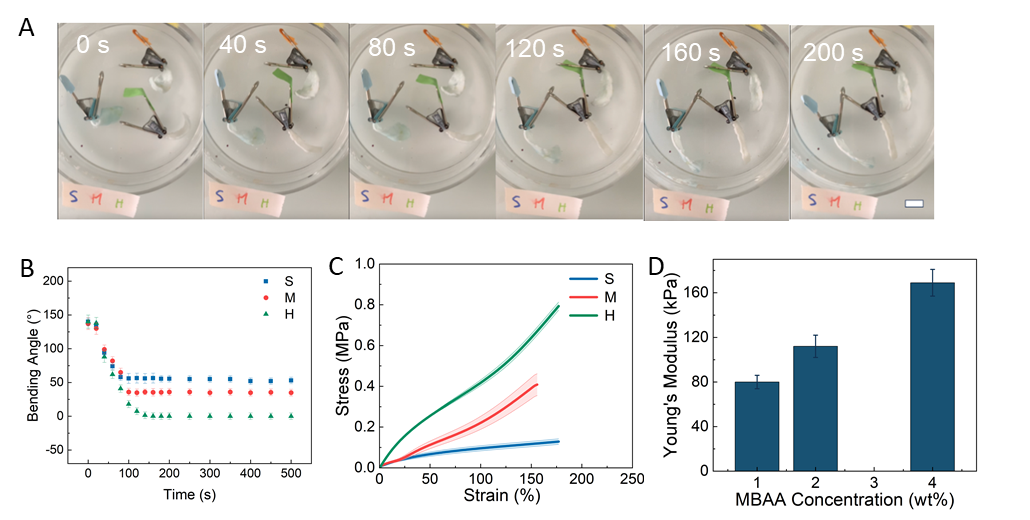


**Fig. S4.** **A.** Timelapse of composite strips immersed in 55°C water. The DNGH-S contains 2 wt% (S), 3.5 wt% (M) and 5 wt% (H) MBA crosslinker (scale bar 5 mm). **B.** Evolution of bending angle with time of composite strips immersed in 55°C water. The DNGH-S contain 2 wt% (blue), 3.5 wt% (red) and 5 wt% (green) MBA crosslinker. **C.** Stress-strain curves of DNGH-S containing 2 wt% (blue), 3.5 wt% (red) and 5 wt% (green) MBA crosslinker. **D**. The Young’s modulus as a function of the MBA crosslinker concentration in the microfragments.


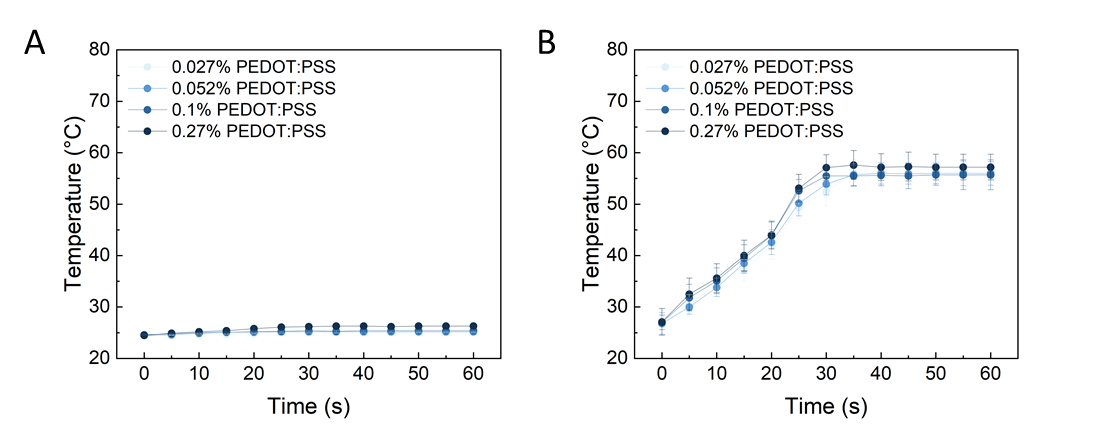


**Fig. S5.** Temperature evolution of single network bulk PAAm gels as a function of the PEDOT: PSS concentration within them if subjected to 5V **A**. without and **B**. with 40 wt% ZnCl2.


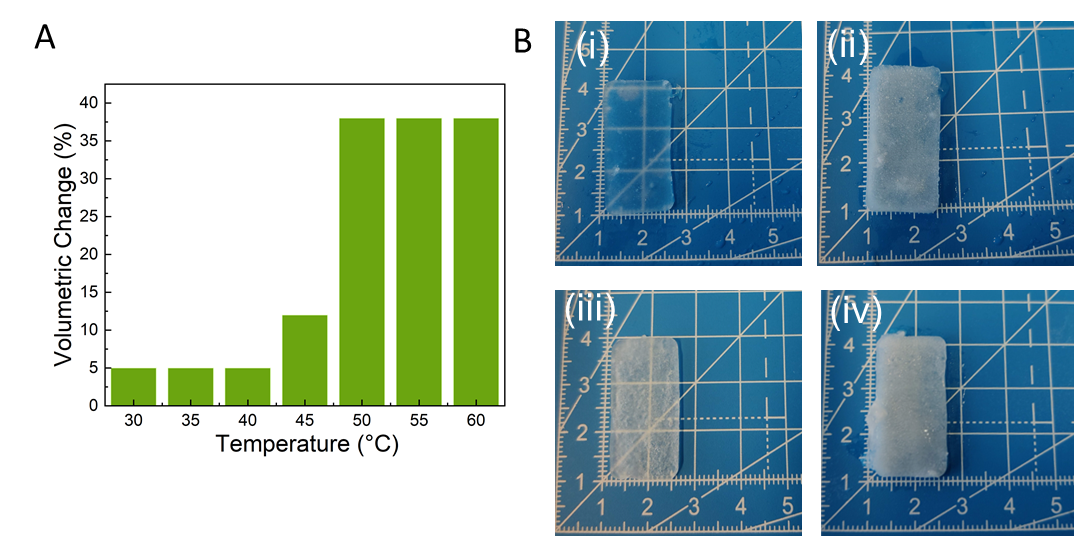


**Fig. S6. A.** Volumetric change of PNIPAM strips containing 1 wt% MBA crosslinker as a function of temperature. **B.** Photographs of PNIPAM strips with (i, ii) 1 wt% and (iii, iv) 4 wt% MBA crosslinker at (i, iii) 25°C and (ii, iv) 50°C.


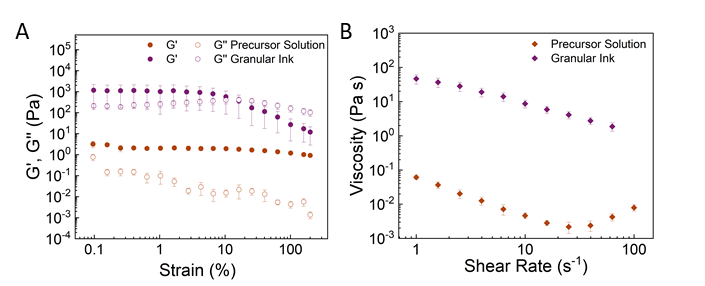


**Fig. S7.** Rheological properties of the PAAm precursor solution (orange), PAMPS/PAAm granular ink (purple) **A.** amplitude sweep and **B.** shear rate.


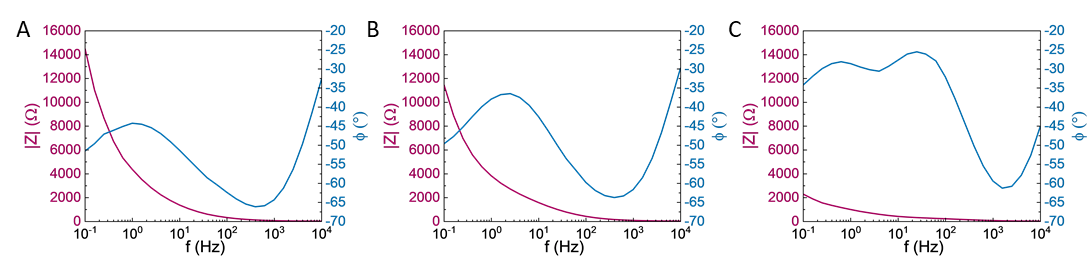


**Fig. S8.** Bode plots featuring the impedance (red) and phase (blue) obtained during impedance spectroscopy of **A.** PAMPS-PAAm DNGHs **B.** PAMPS-PAAm DNGHs functionalized with PEDOT:PSS (DNGH-S) **C.** PAMPS-PAAm DNGHs functionalized with PEDOT:PSS and Zn2+ (DNGH-H).


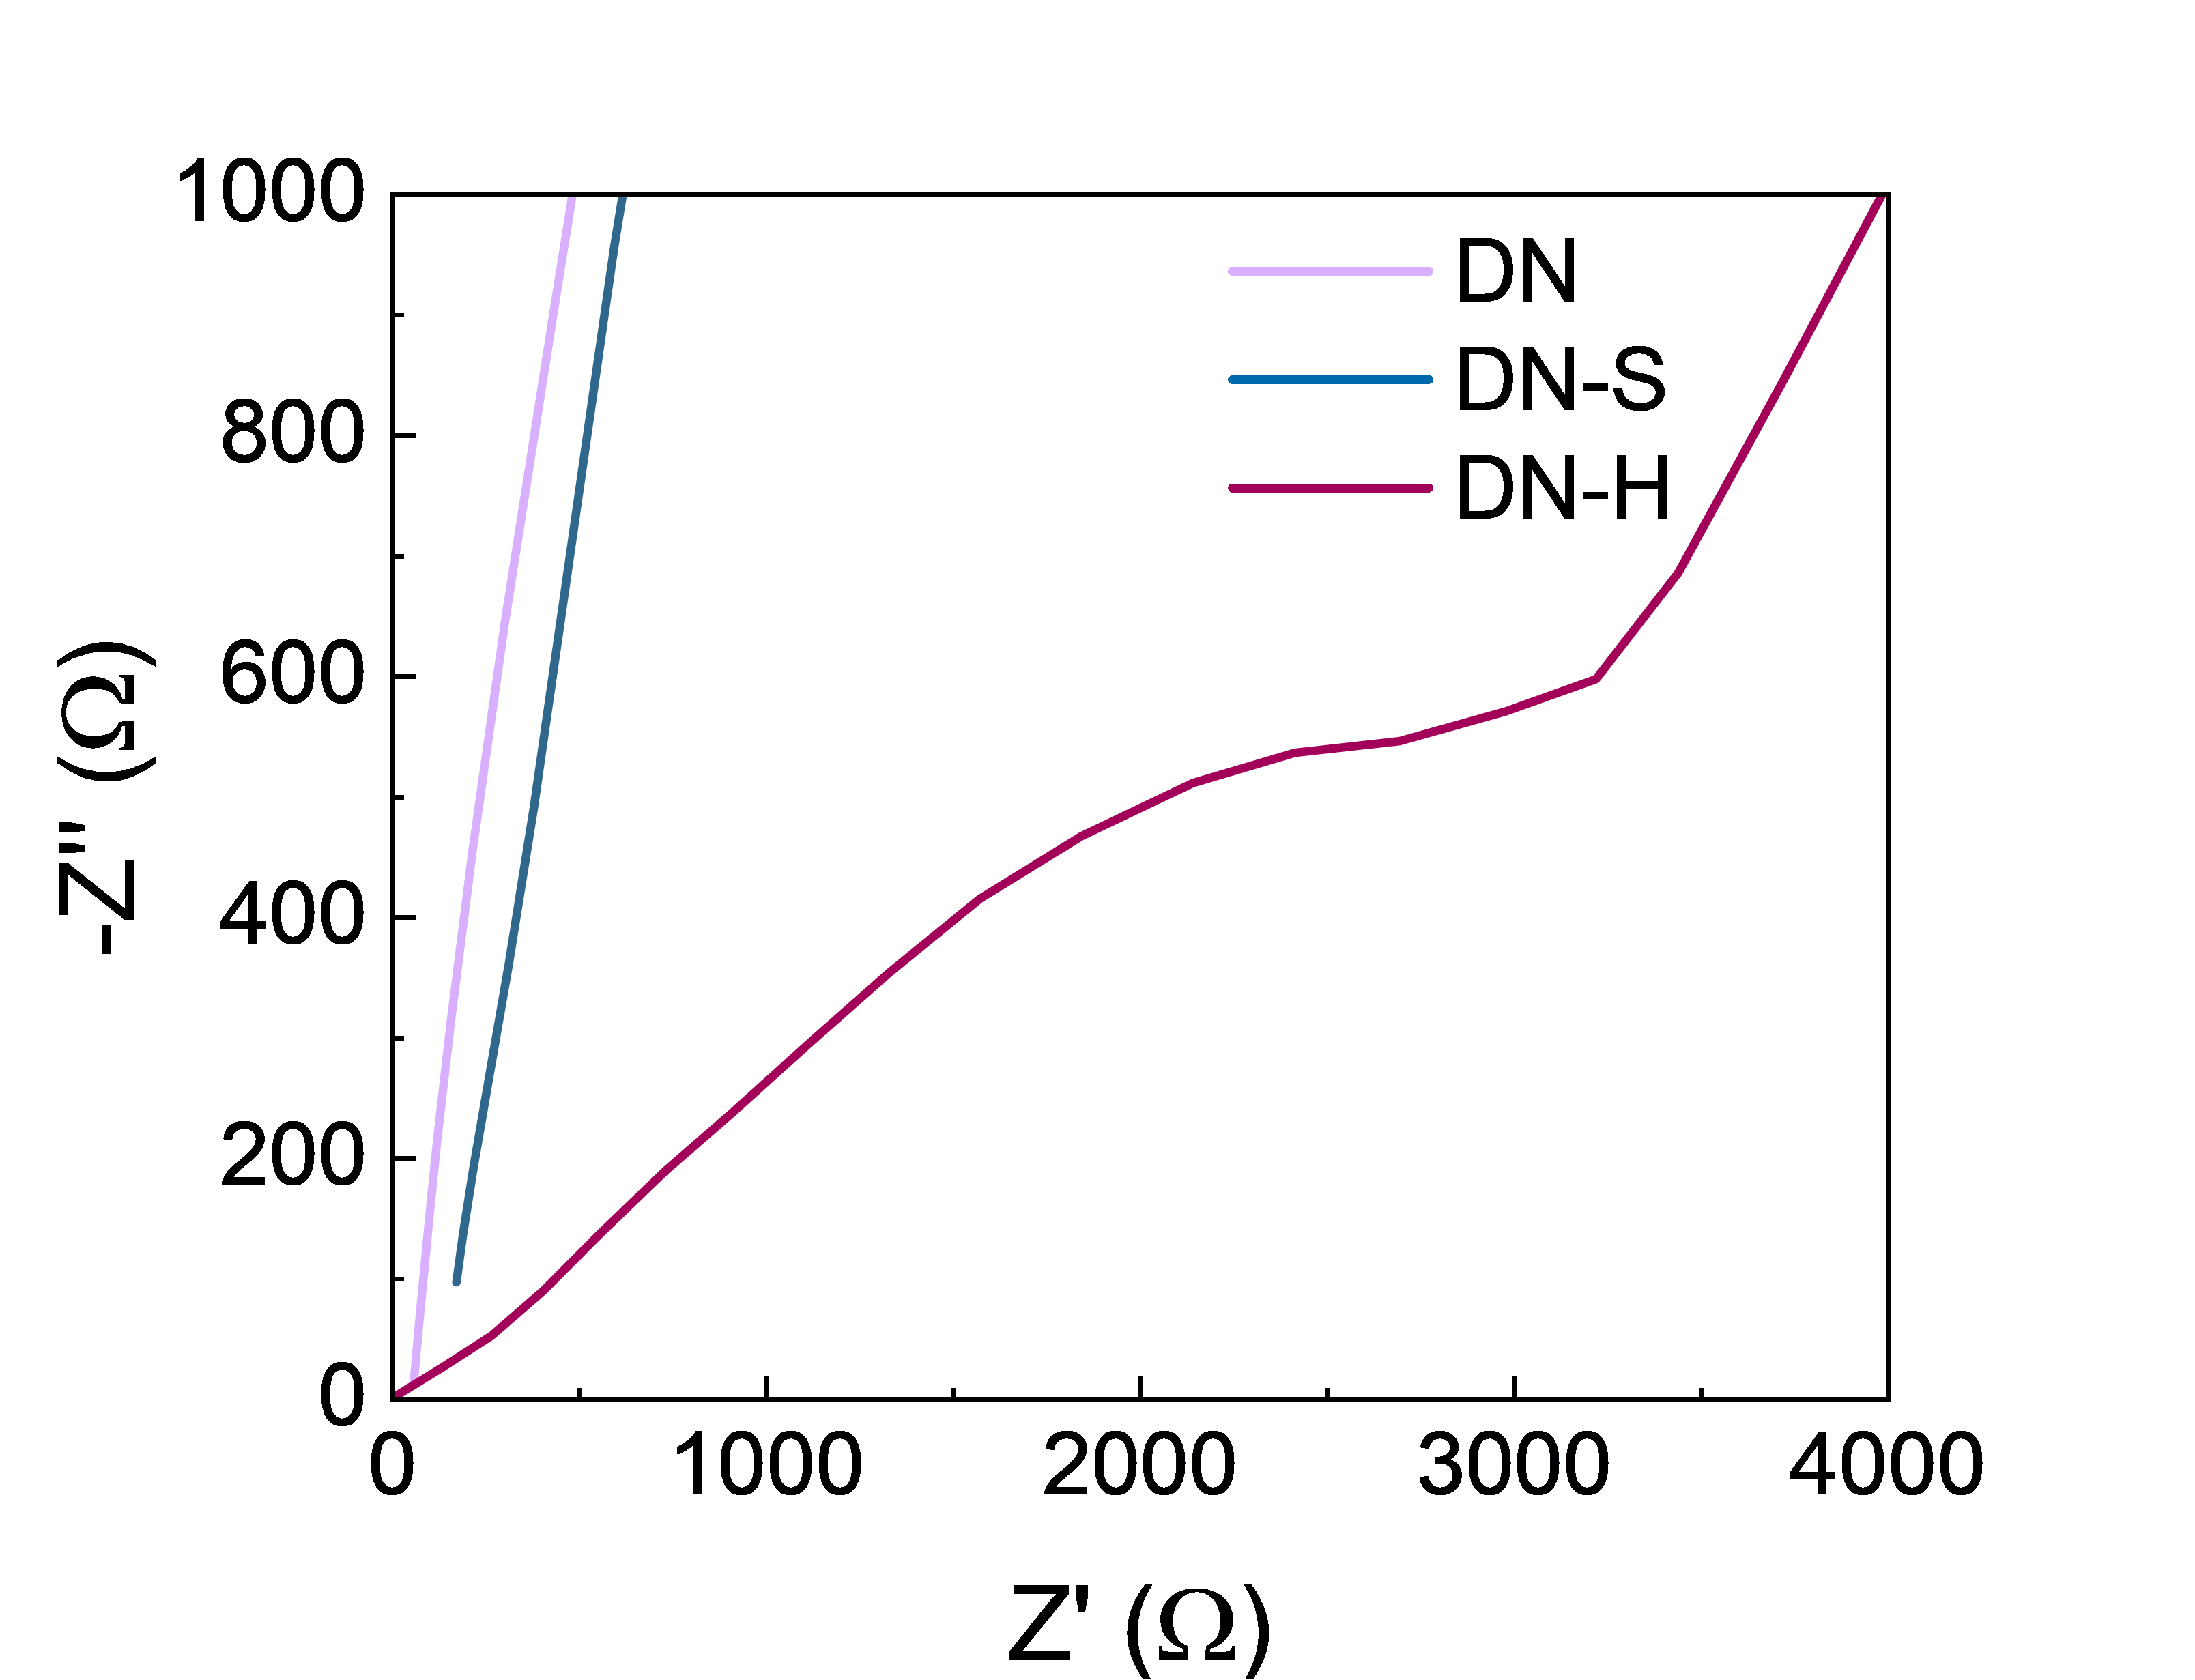


**Fig. S9.** Nyquist plots obtained with impedance spectroscopy for double network bulk (DN), bulk DN-H containing 40 wt% ZnCl2 and 0.027 wt% PEDOT:PSS and DN-S containing 0.027 wt% PEDOT:PSS.


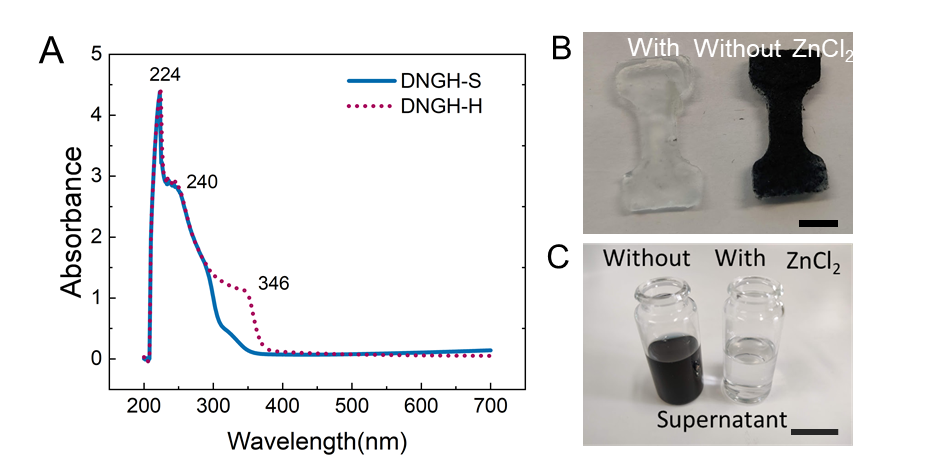


**Fig. S10. A.** UV-VIS Spectra of the supernatant of jammed microgels used to fabricate DNGH-S (blue) and DNGH-A (red). **B.** Photographs of DNGH-S (left) and DNGH-H (right)-scale bar 1 cm
**C.** Photograhs of the supernatant jammed microgels used to make DNGH-S (left) and DNGH-H (right)-scale bar 1 cm.


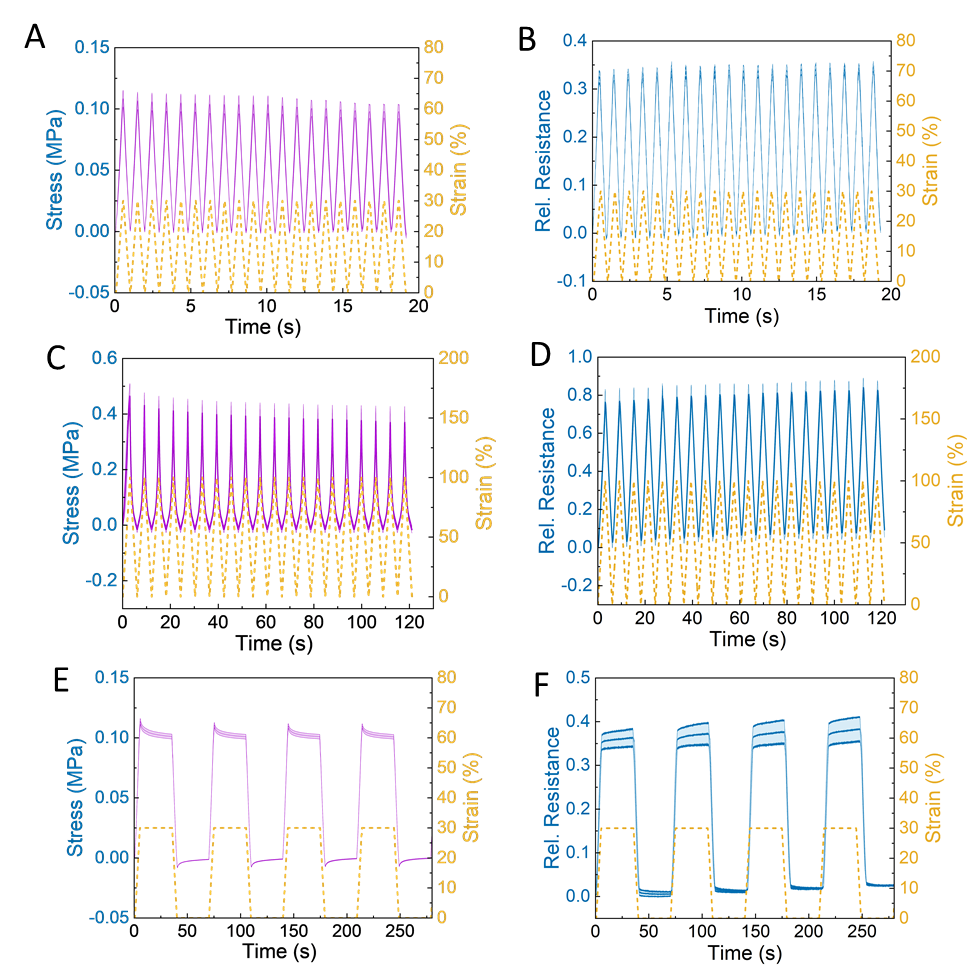


**Fig. S11.** Piezoresistive sensor signal (blue), mechanical stress (purple) and strain (yellow) during the mechanoelectrical characterization of the DNGH-S with 5 wt% MBA, involving: **A**. Stress response and **B**. Relative resistance response during 10 cycles between 0-30% strain. **C**. Stress response and
**D**. Relative resistance response during 10 cycles between 0-100% strain. **E**. Stress response and
**F**. Relative resistance response during 5 cycles between 0-30% strain at maximum and minimum strain.

**Movie 1.** DNGH bilayers at 55°C with DNGH-S containing contain 2 wt% (S), 3.5 wt% (M) and 5 wt% (H) MBA crosslinker.

**Movie 2.** DNGH gripper with closed-loop control picking up an orange and a strawberry. The gripper is programmed to pick up the smaller strawberry thanks to its somatosensory feedback.
